# Supplementary material
Source: PubMed Central journal article supplement (PMC4583068)

Figure S1

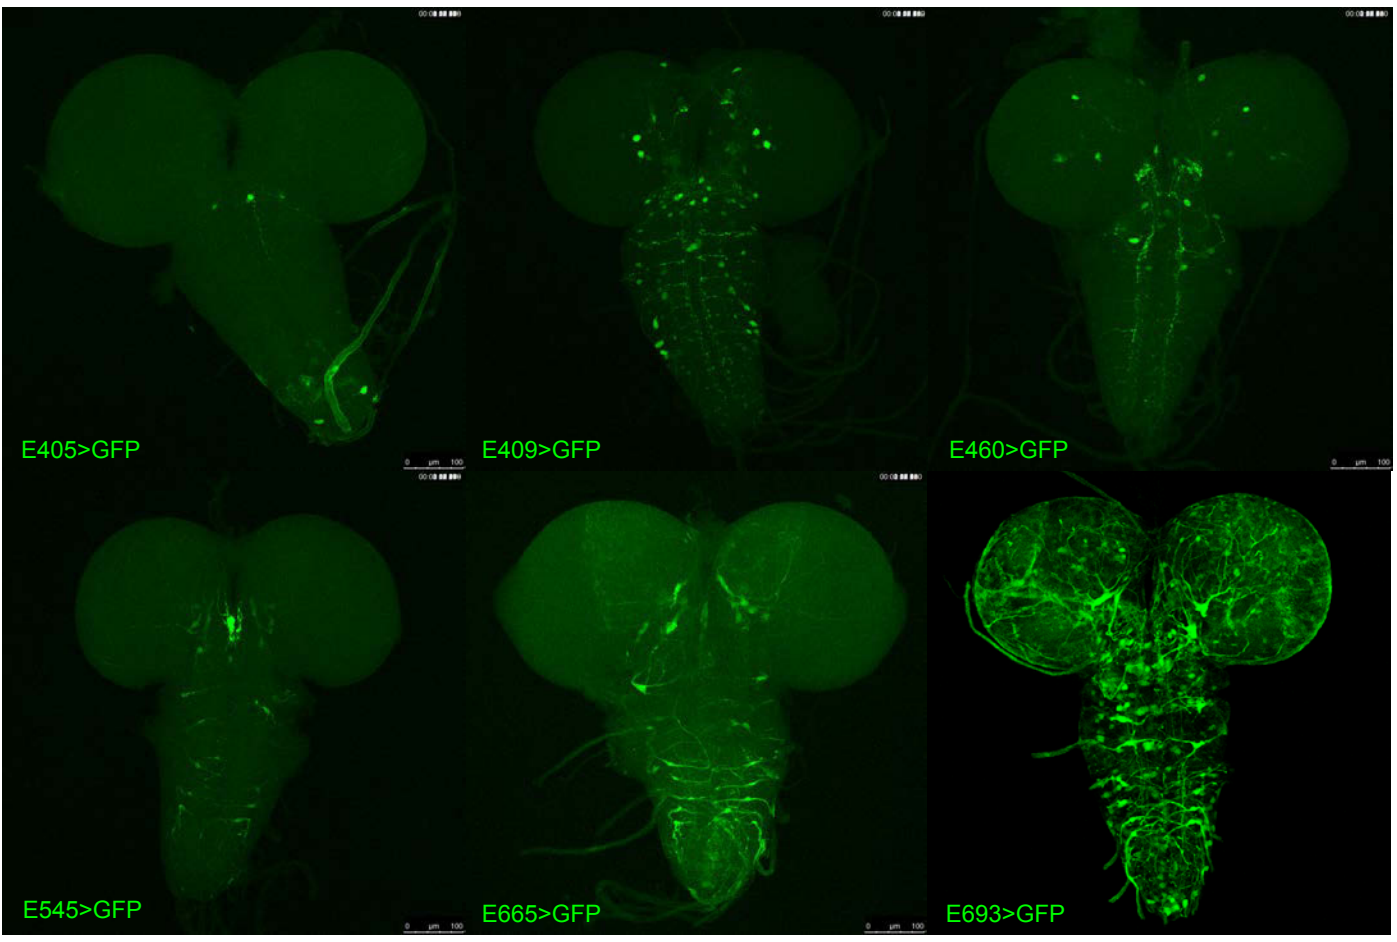

Figure S2

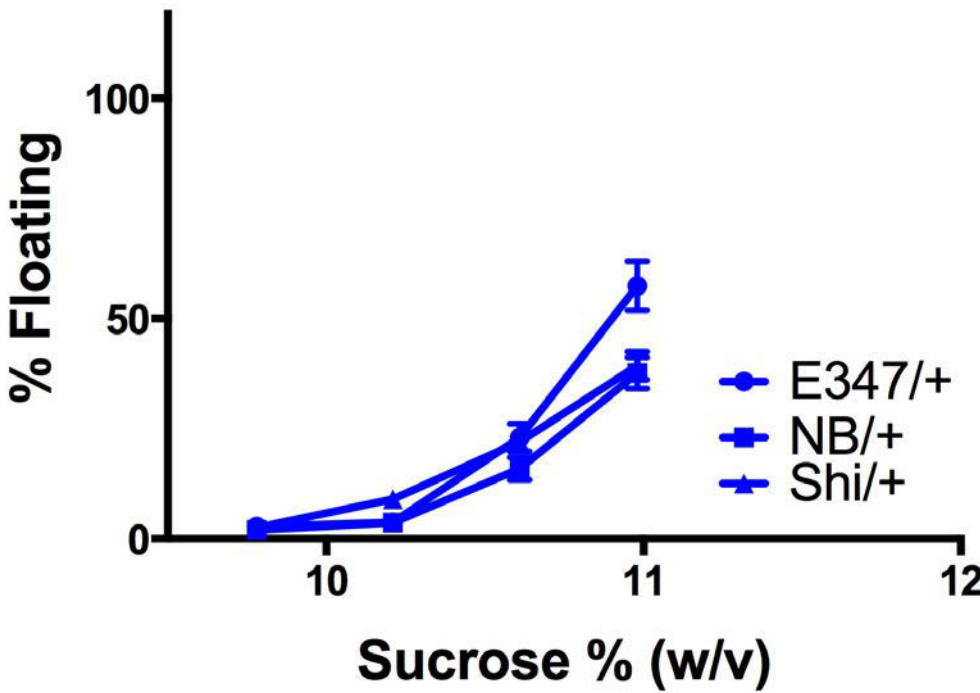

Figure S3

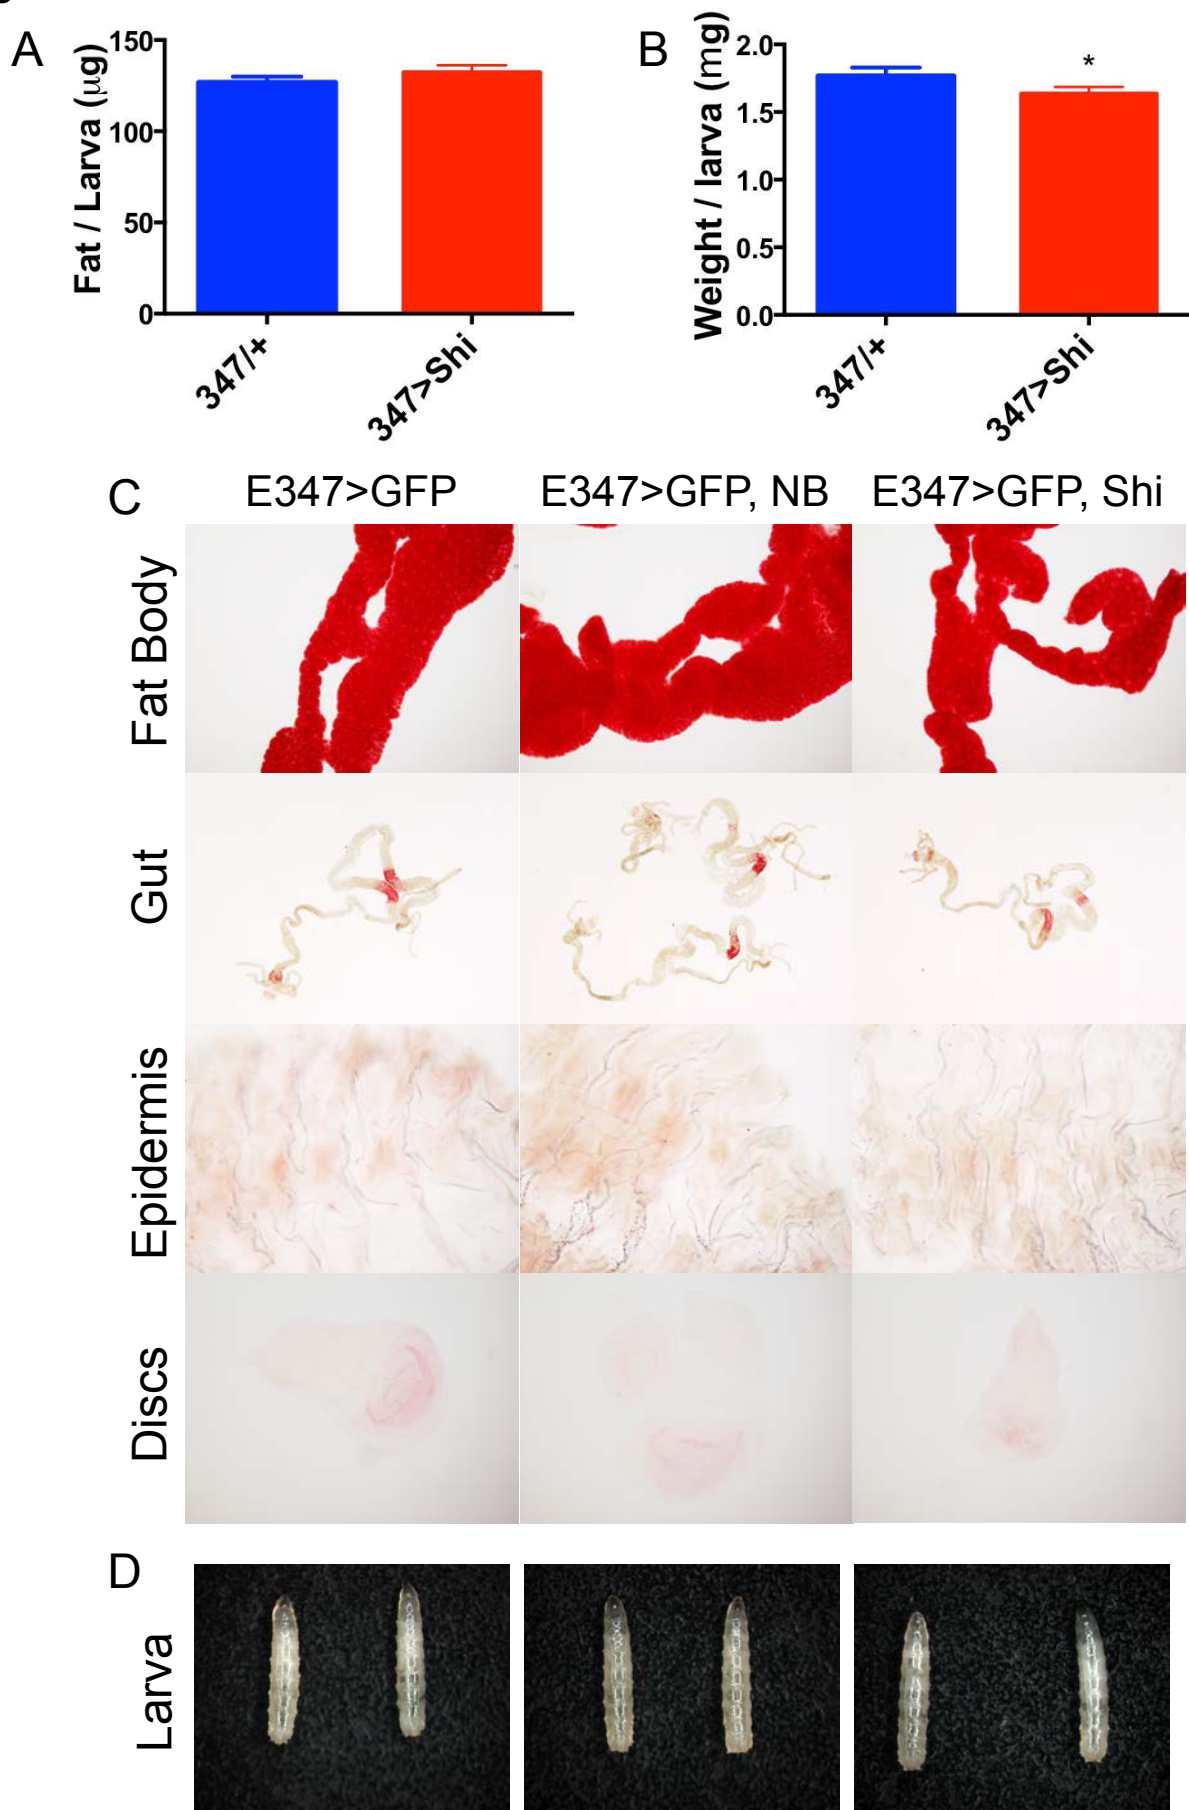

Figure S4

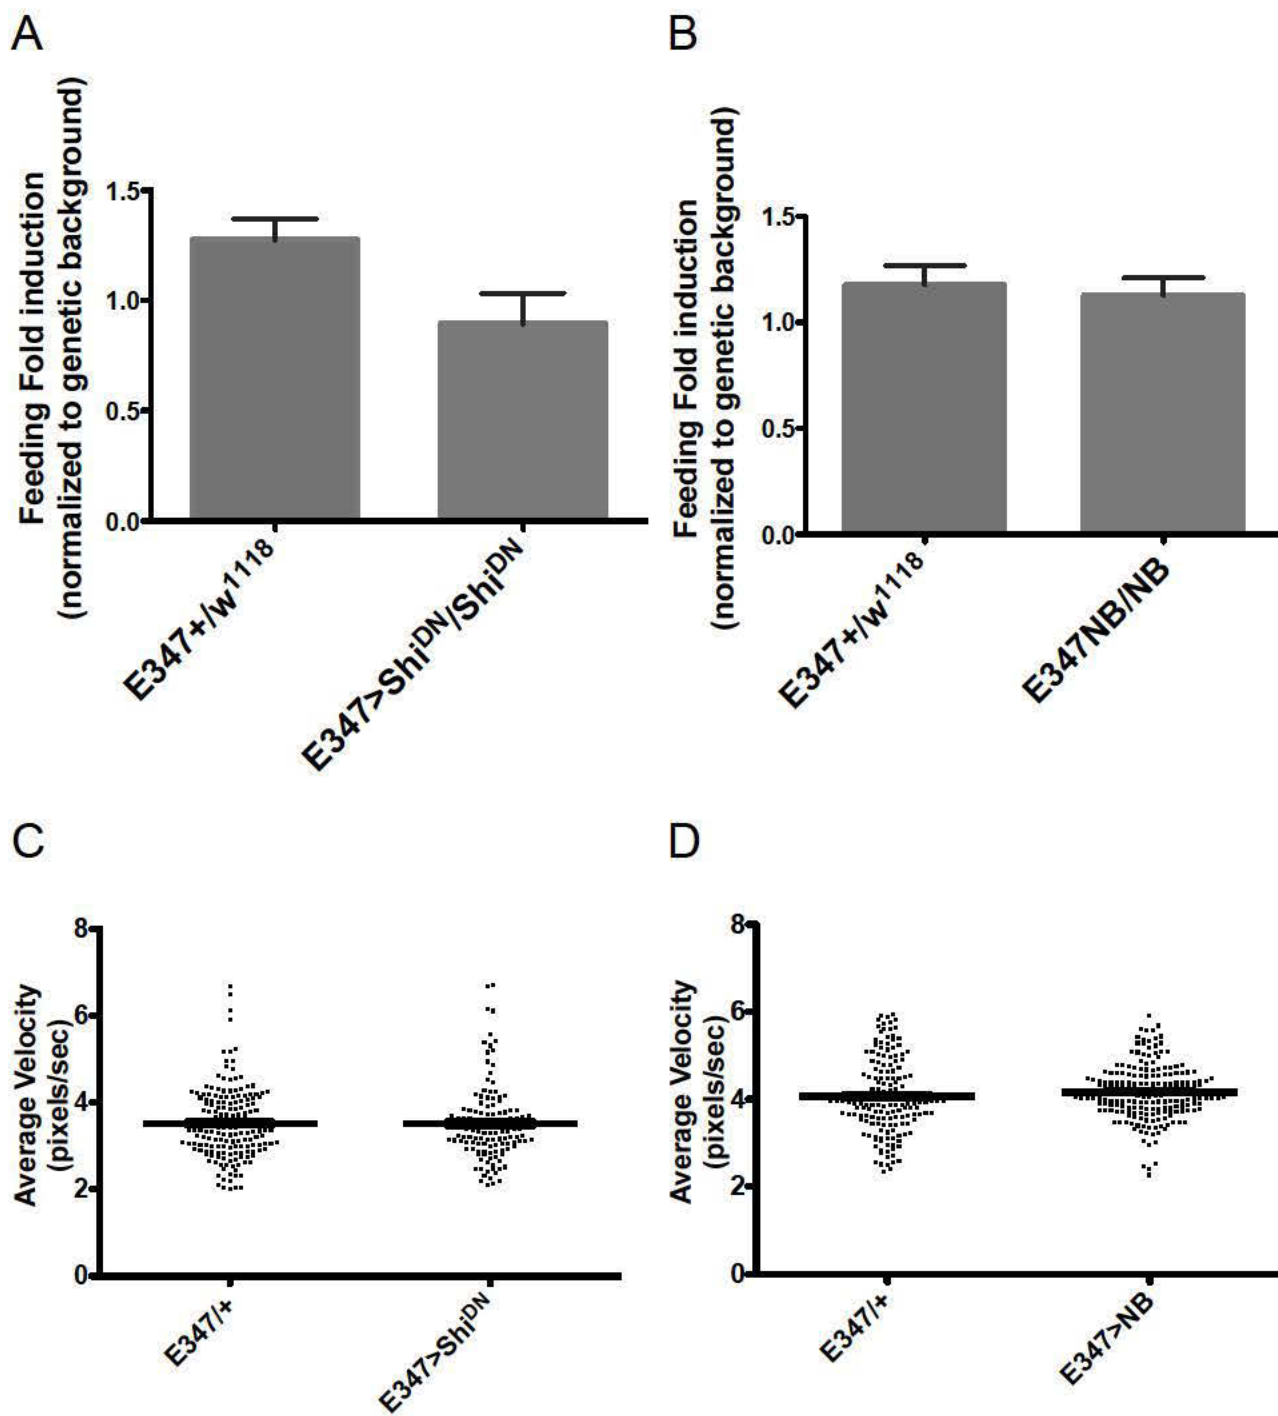

Figure S5

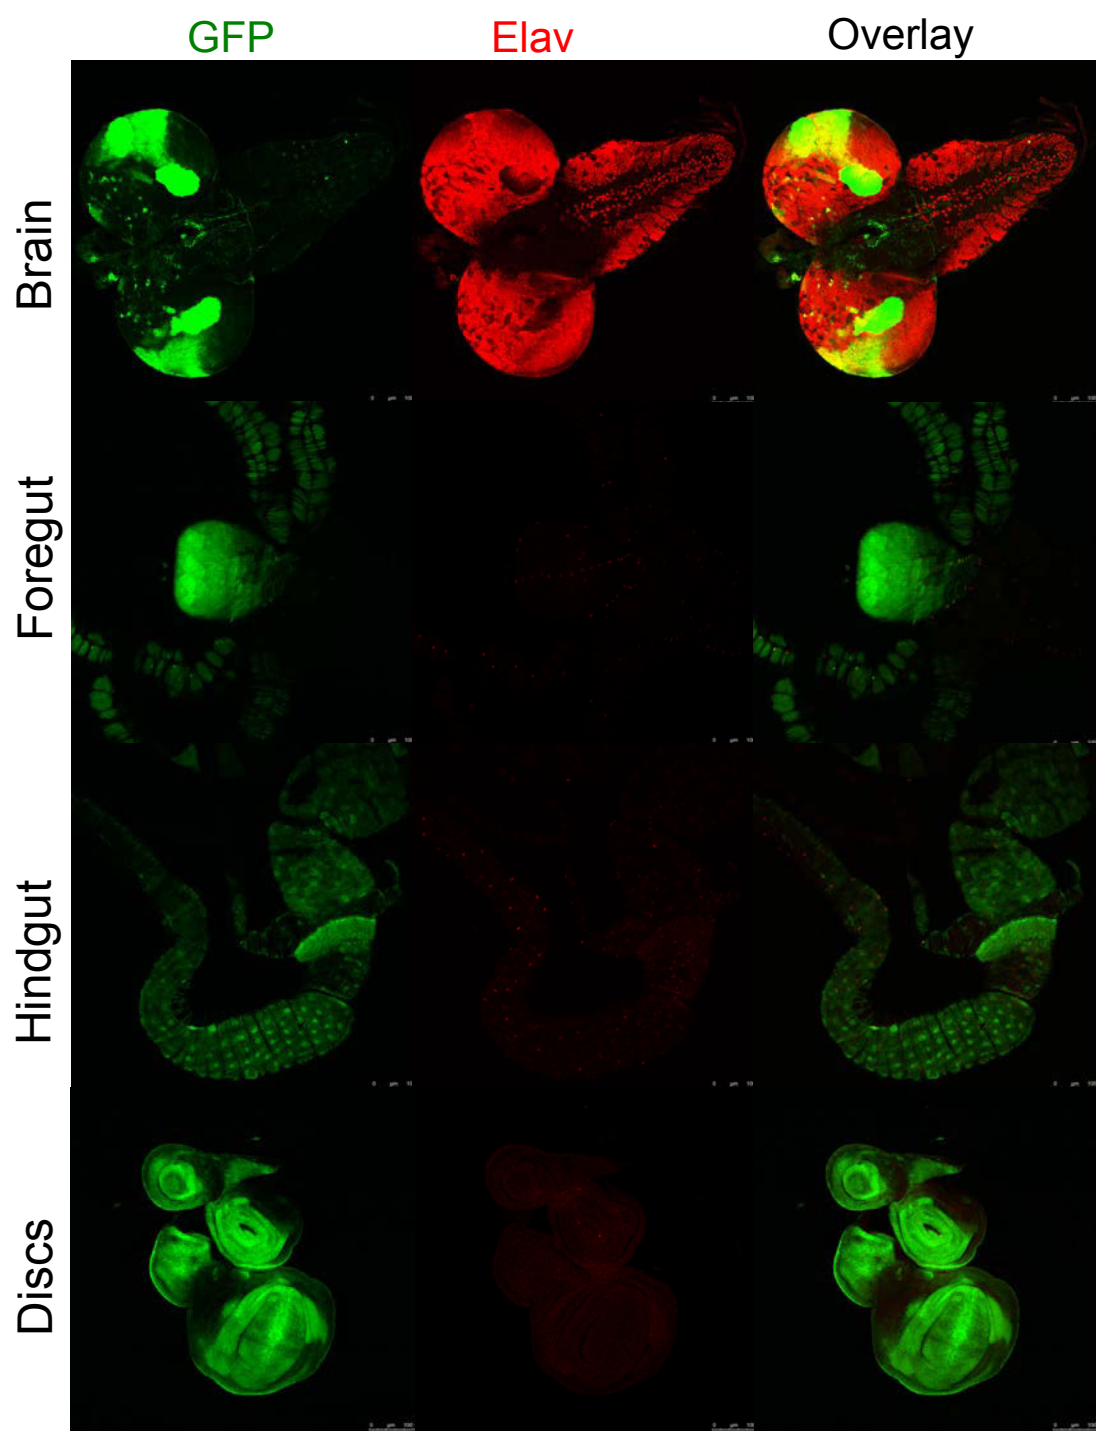

Figure S6

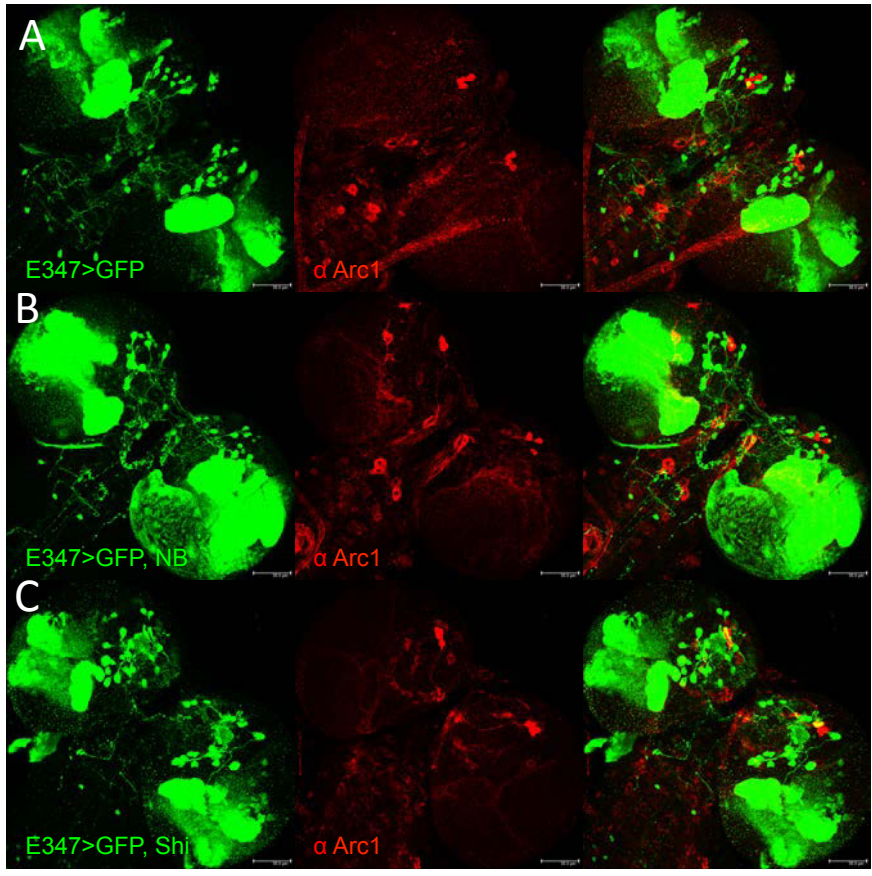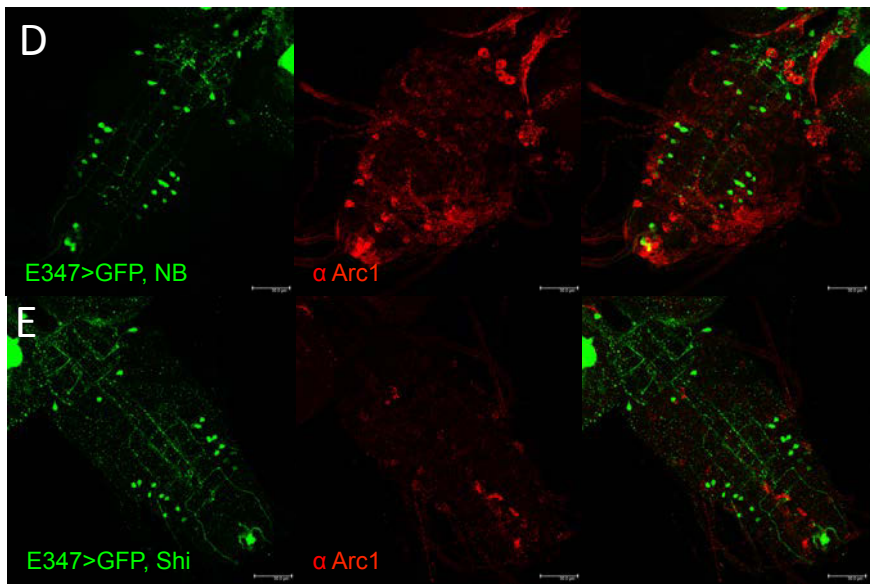

Figure S7

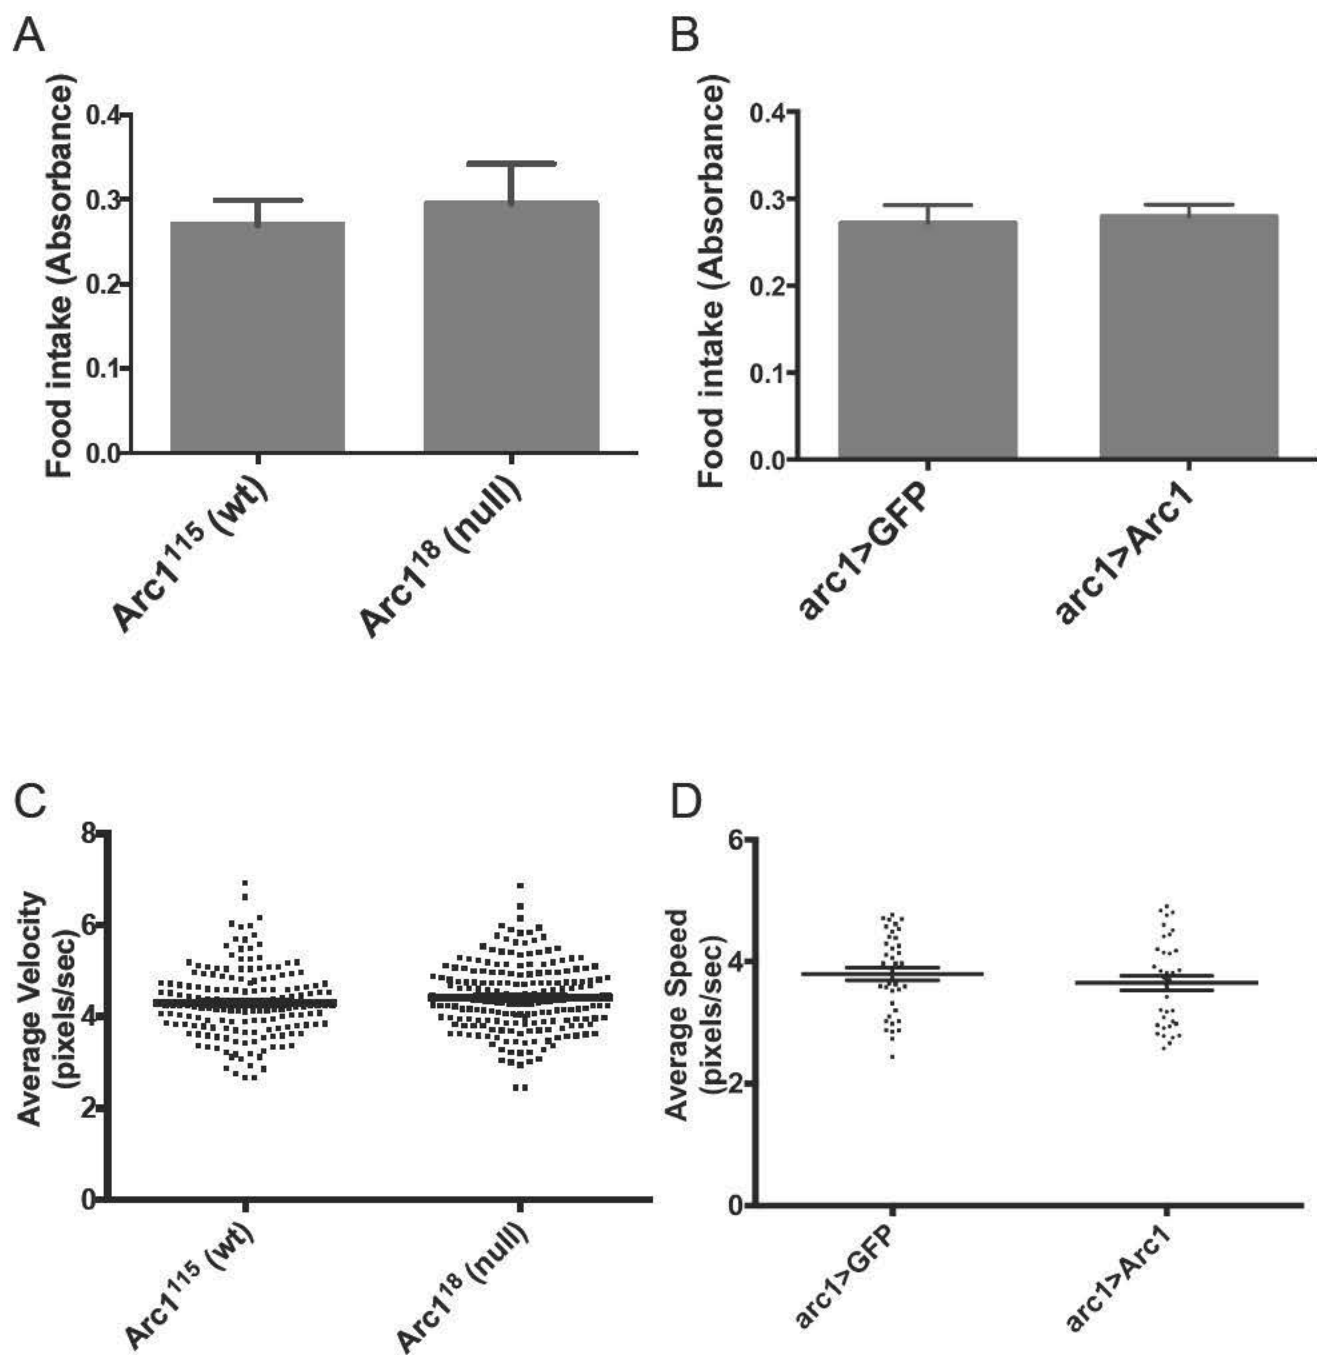

Figure S8

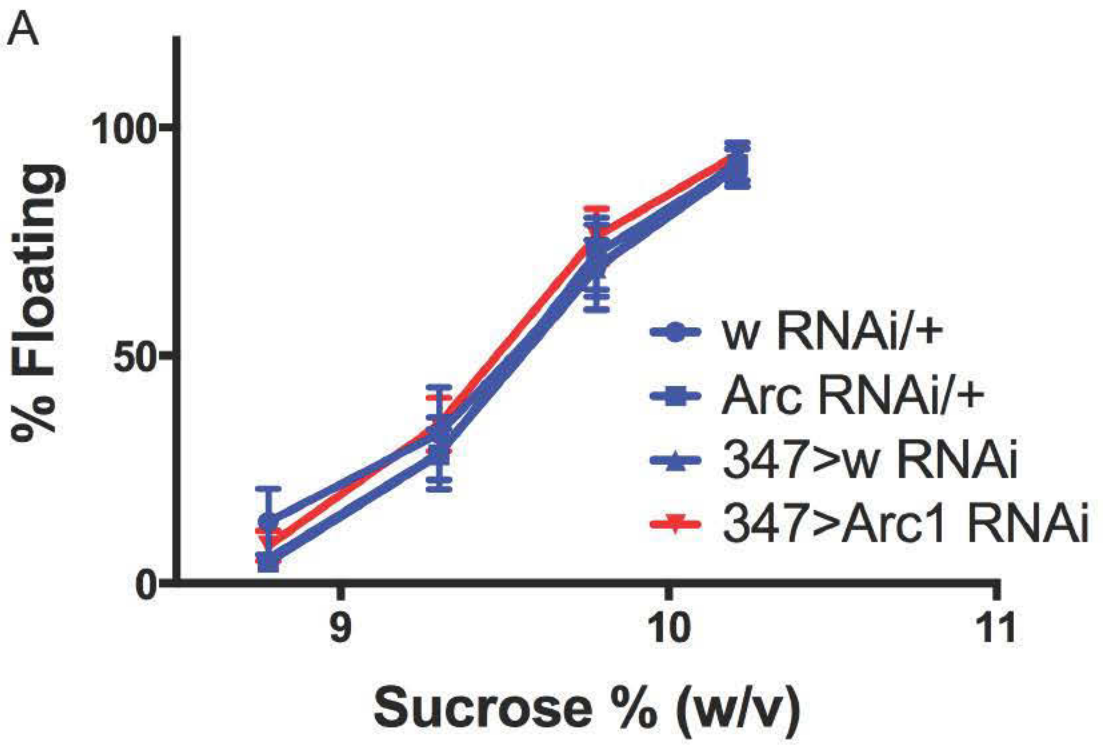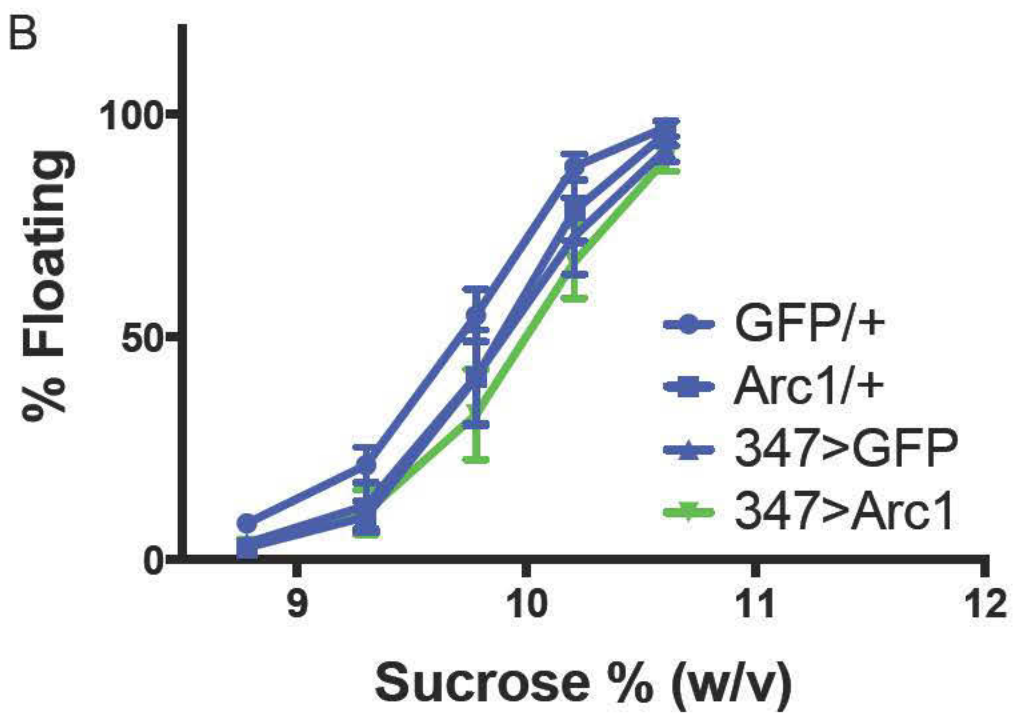



Figure S9

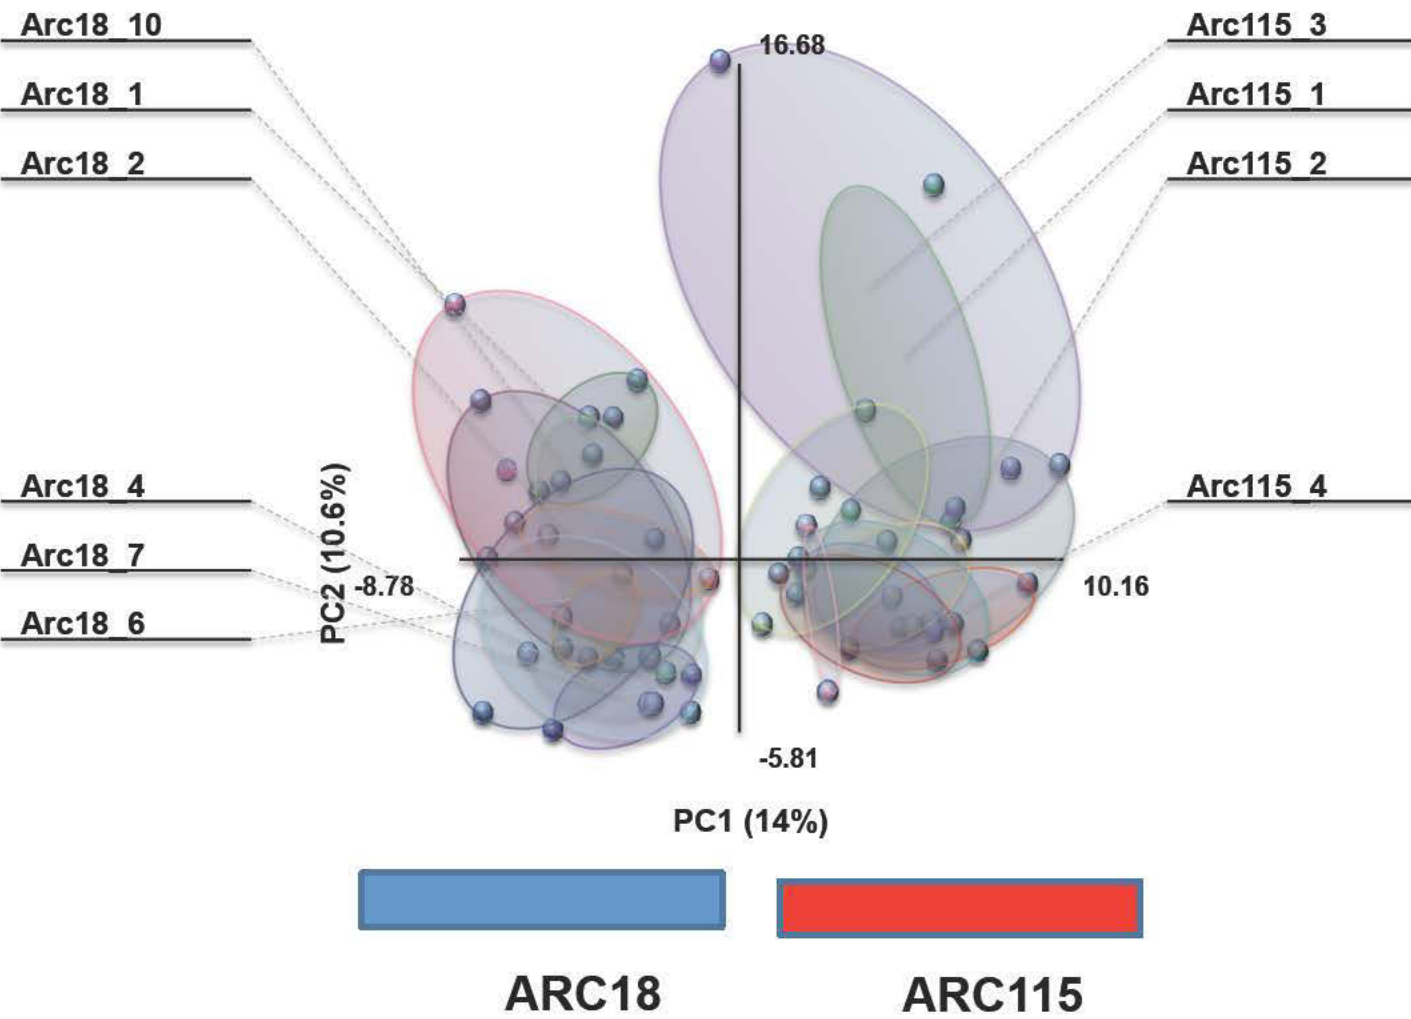

Supplement: NIHMS711083-supplement-1.pdf [file NIHMS711083-supplement-1.pdf]
